# Supplementary material for: Particle-in-a-frame gold nanomaterials with an interior nanogap-based sensor array for versatile analyte detection
Source: Royal Society of Chemistry journal article supplement (doi:10.1039/d1cc01094h), 2021-01-01
Supplement: d1cc01094h1.pdf [file d1cc01094h1.pdf]

## Supporting Information

### **Particle-in-a-frame gold nanomaterials with interior nanogap-based sensor array for versatile analyte detection**

*Feiyang Wang, Na Na, and Jin Ouyang\**

Key Laboratory of Theoretical and Computational Photochemistry, Ministry of Education, College of Chemistry, Beijing Normal University, Beijing, 100875 (P. R. China)

\*Corresponding author: Tel: +86-10-58805373; Fax: +86-10-62799838

E-mail: jinoyang@bnu.edu.cn

## Experimental Section

**Chemicals and Materials.**  $\text{HAuCl}_4 \cdot 4\text{H}_2\text{O}$  was obtained from Sinopharm Chemical Reagent Company (Beijing, China). Melatonin (MT), L-cysteine (L-Cys), uric acid (UA), glutathione (GSH), 3,3',5,5'-tetramethylbenzidine (TMB), potassium iodide (KI), and silver nitrate ( $\text{AgNO}_3$ ) were purchased from Aladdin Industrial Corporation (Shanghai, China). Lysozyme (Lys), human serum albumin (HSA), horseradish peroxidase (HRP), bovine albumin (BSA), trypsin (Try), haemoglobin (Hem), immunoglobulin G (IgG), hydrogen peroxide ( $\text{H}_2\text{O}_2$ ), and sodium citrate were acquired from Innochem Chemical Reagent Company (Beijing, China). PVP (MW = 55,000), sodium borohydride ( $\text{NaBH}_4$ ), and L-ascorbic acid (AA) were obtained from Sigma (St. Louis, MO, USA). Acetic acid (HAc) and sodium acetate (NaAc) were acquired from Damao Chemical Reagent Factory (Tianjin, China). Sodium chloride was purchased from Beijing Chemical Works (Beijing, China). Ultrapure water was prepared with a Milli-Q water purification system (Millipore, Milford, MA, USA).

**Instrumentation.** Transmission electron microscopy (TEM) images were obtained using a JEOL 2010 transmission electron microscope. Circular dichroism (CD) spectra were obtained on a J-810 spectropolarimeter (JASCO). Absorption spectra were acquired using a microplate reader (Varioskan LUX Filter, Thermo Fisher Scientific, Waltham, USA). The isothermal titration calorimetry (ITC) data were obtained by an ITC 200 (Malvern Instruments Ltd, UK). The linear discriminant analysis (LDA) diagram was processed by SYSTAT 13.0 software. Hierarchical cluster analysis (HCA) was obtained from IBM SPSS Statistics 20.0.

**Synthesis of nanomaterials.** Preparation of Ag nanoprisms <sup>1</sup>: 600  $\mu\text{L}$  of 5 mM  $\text{AgNO}_3$  was mixed with 25.5 mL of deionized water in a conical bottle. Sodium citrate (1.8 mL, 30 mM) and PVP (1.8 mL, 5  $\text{mg}\cdot\text{mL}^{-1}$ ) were added and stirred vigorously at room temperature. After a few minutes, hydrogen peroxide (60  $\mu\text{L}$ ) and sodium borohydride (300  $\mu\text{L}$ , 100 mM) were quickly added. After stirring for 30 minutes, Ag nanoprisms were synthesized.

Synthesis of Au PIAF <sup>1</sup>: PVP (4 mL, 10  $\text{mg}\cdot\text{mL}^{-1}$ ) and deionized water (3.2 mL) were added into a conical bottle.  $\text{HAuCl}_4\cdot 4\text{H}_2\text{O}$  (200  $\mu\text{L}$ , 10 mM), KI (40  $\mu\text{L}$ , 50 mM) and AA (200  $\mu\text{L}$ , 100 mM) were added sequentially and the solution was mixed gently. The Ag nanoprism seed solution (2 mL) was quickly added and the solution was shaken evenly. The solution was left at 0 °C for 30 minutes.

**Discrimination of multiple substances.** Forty microlitres of Au PIAF was incubated with 50  $\mu\text{L}$  of protein for 30 minutes, and then 40  $\mu\text{L}$  of TMB (10 mM), 30  $\mu\text{L}$  of hydrogen peroxide (3 M) and 340  $\mu\text{L}$  of buffer solution (pH = 4, 0.2 M) were added to the system. The system was incubated at 37 °C for 40 minutes. The method for detecting antioxidants and cells was the same as that for proteins, except for changes in substances. The methods of cell treatment were described in previous literature.<sup>2</sup> The concentration of each cell was diluted to the same concentration (approximately 85000/mL). We used the serum solution of healthy people, which was centrifuged at 14000 r/min to remove insoluble matter and impurities. After that, the serum was diluted twice with ultrapure water.

## Results and Discussion

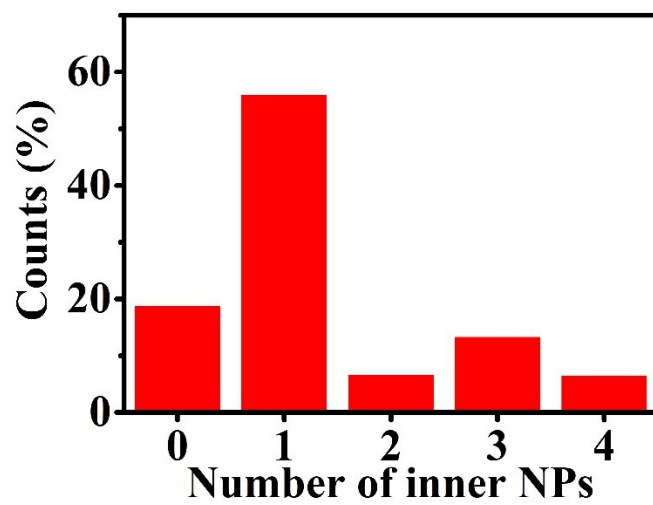

**Fig. S1** The distribution of Au PIAF containing the number of inner NPs obtained from the TEM diagram

**Table S1** Basic properties and manufacturers of proteins

| <b>Protein</b>               | <b>MW (kDa)</b> | <b>pI</b> | <b>Metal</b> |
|------------------------------|-----------------|-----------|--------------|
| Hemoglobin (Hem)             | 64.5            | 6.8       | Yes          |
| Trypsin (Try)                | 24              | 10.5      | No           |
| Horseradish peroxidase (HRP) | ~40             | 3.9       | Yes          |
| Human serum albumin (HSA)    | 69.4            | 5.2       | No           |
| Lysozyme (Lys)               | 14.4            | 11.0      | No           |
| Bovine serum albumin (BSA)   | 66.3            | 4.8       | No           |
| Immunoglobulin G (IgG)       | 150             | 7.5       | No           |

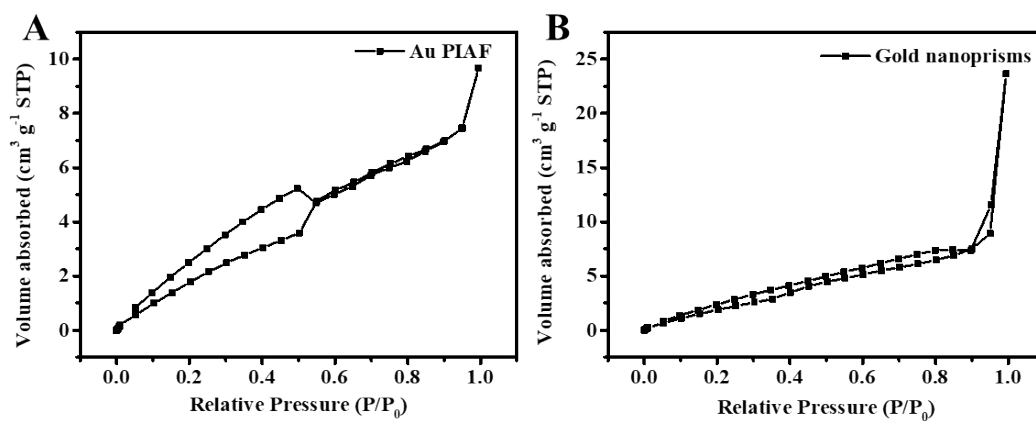

**Fig. S2** Nitrogen adsorption/desorption isotherms of Au PIAF and gold nanoprisms. The specific surface area of Au PIAF is  $11.333 \text{ m}^2 \text{ g}^{-1}$ , the specific surface area of gold nanoprisms is  $10.688 \text{ m}^2 \text{ g}^{-1}$ .

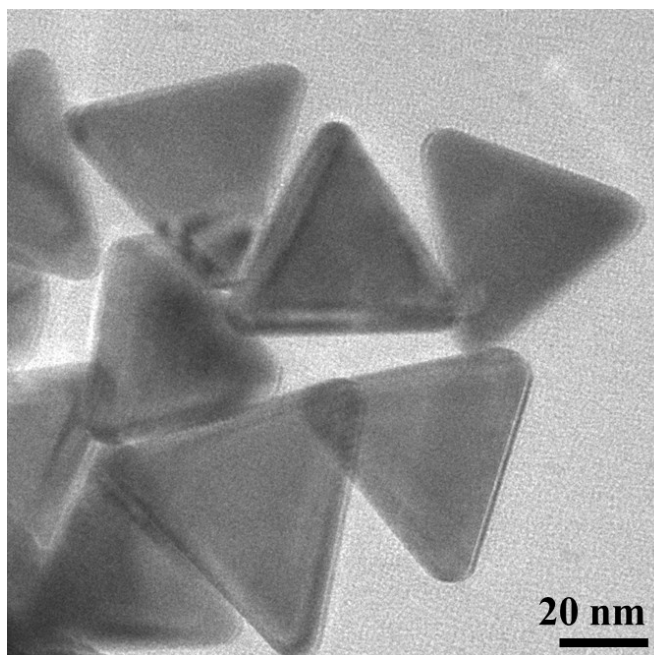

**Fig. S3** TEM images of gold nanoprisms. Gold nanoprisms was prepared using previously reported methods.<sup>3</sup>

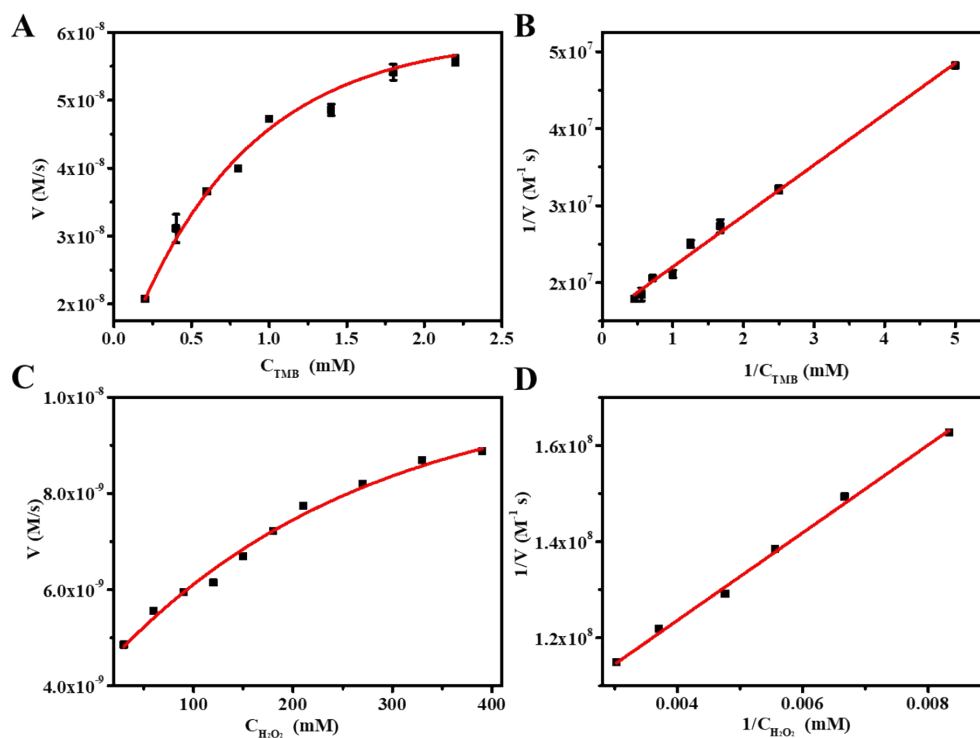

**Fig. S4** Steady-state kinetic assays of the Au PIAF for the oxidation of TMB by H<sub>2</sub>O<sub>2</sub>. The kinetic data were obtained by varying one substrate concentrations while keeping the other substrate concentration constant (A, C). The Lineweaver-Burk plots (B, D) of the double reciprocal of the Michaelis-Menten equations.



**Table 2** Comparison of the Kinetic Parameters of various enzyme

| Catalyst | Substrate                     | $K_m$ [mM] | $V_{max}$ [ $10^{-8}$ M S $^{-1}$ ] | References |
|----------|-------------------------------|------------|-------------------------------------|------------|
| PBNPs    | TMB                           | 0.34       | 21.60                               | 4          |
|          | H <sub>2</sub> O <sub>2</sub> | 14.70      | 11.50                               |            |
| Fe-MOF   | TMB                           | 2.60       | 5.60                                | 5          |
|          | H <sub>2</sub> O <sub>2</sub> | 1.30       | 2.50                                |            |
| HRP      | TMB                           | 0.43       | 10.00                               | 6          |
|          | H <sub>2</sub> O <sub>2</sub> | 0.07       | 0.56                                |            |
| Au PIAF  | TMB                           | 0.42       | 6.47                                | This work  |
|          | H <sub>2</sub> O <sub>2</sub> | 10.43      | 1.14                                |            |

The maximum initial velocity ( $V_{max}$ ) and Michaelis-Menten constant ( $K_m$ ) were estimated by Lineweaver-Burk plot,  $1/V = K_m/V_{max}[S] + 1/V_{max}$ ; where  $V$  was the initial reaction rate and  $[S]$  was the concentration of the substrate.

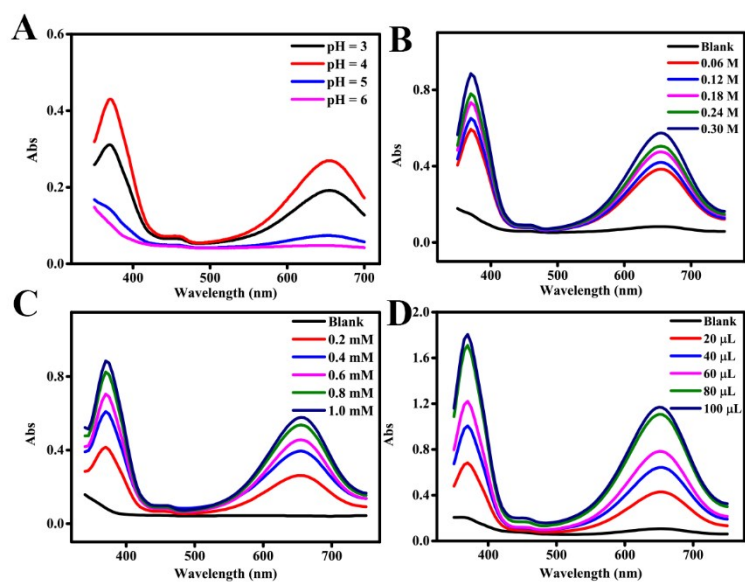

**Fig. S5** UV-vis spectra under different conditions A) pH; B)  $H_2O_2$ ; C) TMB; D) Au PIAF.

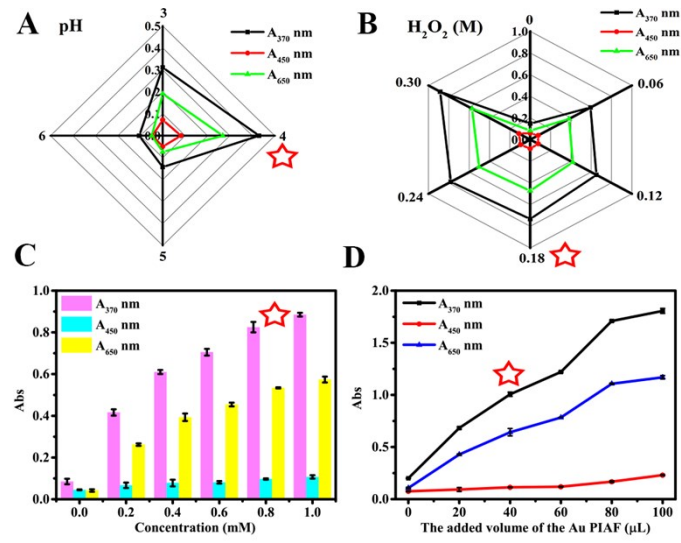

**Fig. S6** Changes in absorbance values under different conditions A) pH; B) H<sub>2</sub>O<sub>2</sub>; C) TMB; D) Au PIAF.

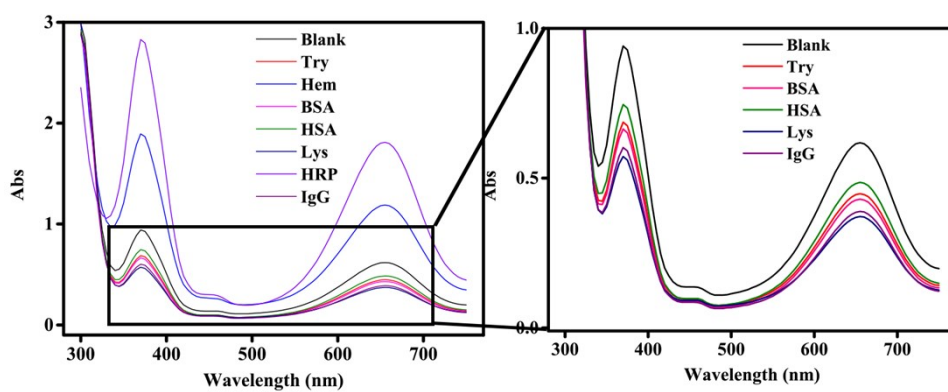

**Fig. S7** The UV-vis spectra of array in presence of different proteins.

**Table S3** Identification of unknown protein samples (50 nM) using the colorimetric sensor array in aqueous solution

| Samples | A <sub>370</sub> | A <sub>450</sub> | A <sub>650</sub> | Identification | Verification |
|---------|------------------|------------------|------------------|----------------|--------------|
| 1       | 0.184            | 0.188            | 0.301            | Try            | Try          |
| 2       | 0.267            | 0.179            | 0.256            | BSA            | BSA          |
| 3       | 0.401            | 0.161            | 0.384            | Lys            | Lys          |
| 4       | -2.275           | -0.866           | -0.811           | HRP            | HRP          |
| 5       | 0.314            | 0.107            | 0.251            | IgG            | IgG          |
| 6       | 0.239            | 0.107            | 0.241            | Try            | Try          |
| 7       | -0.864           | -1.884           | -2.301           | Hem            | Hem          |
| 8       | 0.176            | 0.134            | 0.230            | HSA            | HSA          |
| 9       | 0.401            | 0.214            | 0.424            | Lys            | Lys          |
| 10      | 0.257            | 0.125            | 0.244            | BSA            | BSA          |
| 11      | 0.247            | 0.121            | 0.239            | <b>BSA</b>     | <b>HSA</b>   |
| 12      | -2.187           | -0.795           | -0.774           | HRP            | HRP          |
| 13      | 0.305            | 0.161            | 0.244            | IgG            | IgG          |
| 14      | -0.829           | -1.688           | -2.226           | Hem            | Hem          |

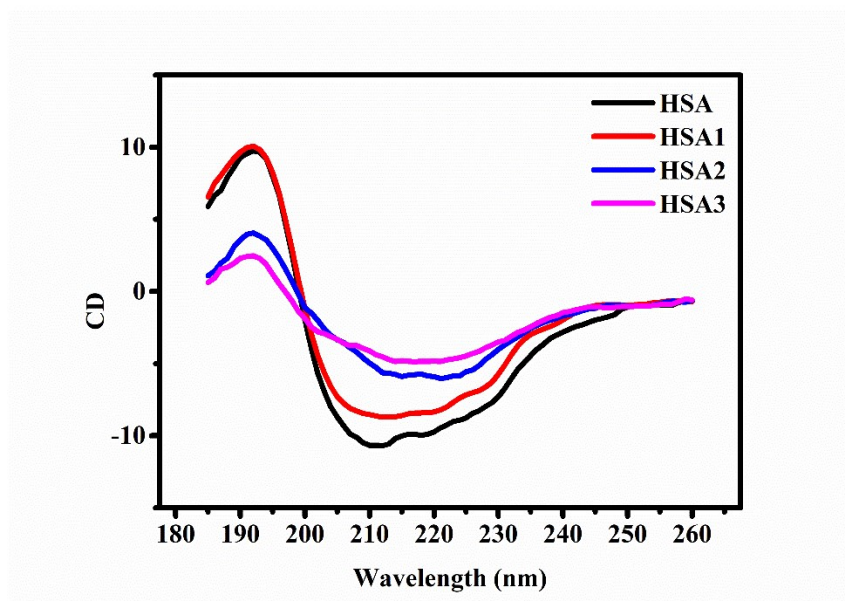

**Fig. S8** Circular dichroism spectra of HSA protein: 1) heated at 60 °C for 10 min, 2) heated at 80 °C for 10 min; 3) heated at 80 °C for 20 min.

**Table S4** Secondary structures of native proteins and thermally denatured proteins: 1) heated at 60 °C for 10 min, 2) heated at 80 °C for 10 min; 3) heated at 80 °C for 20 min.)

|            | HSA  | HSA1 | HSA2 | HSA3 |
|------------|------|------|------|------|
| $\alpha$ % | 30.9 | 28.7 | 21.5 | 19.0 |
| $\beta$ %  | 21.1 | 23.8 | 24.8 | 27.4 |
| Turn %     | 18.0 | 18.3 | 19.4 | 20.1 |
| Random %   | 29.2 | 31.9 | 42.6 | 45.2 |

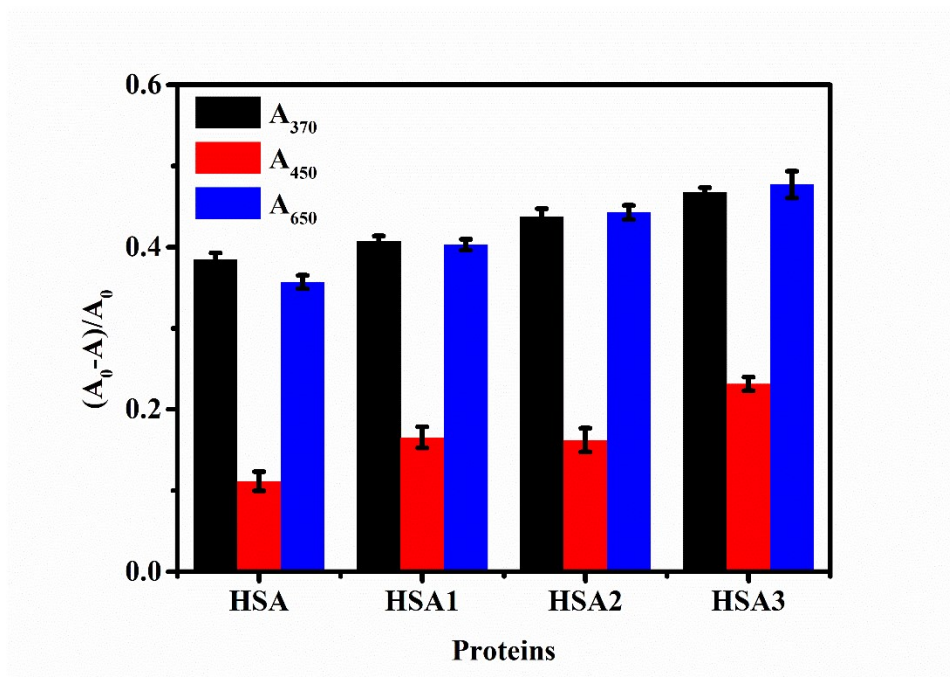

**Fig. S9** Absorbance response for native proteins and thermally denatured proteins



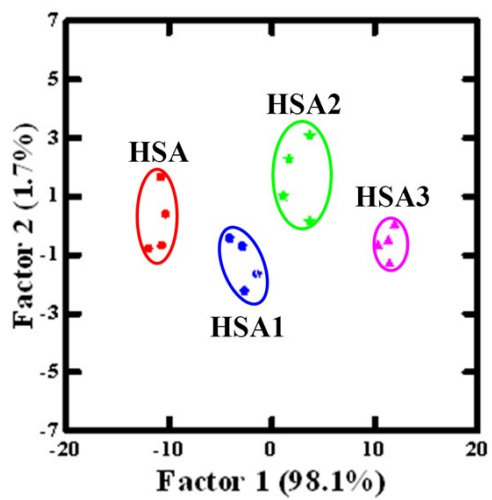

**Fig. S10** LDA for thermally denatured proteins.

**Table S5** Identification of unknown protein samples (native and thermally denatured proteins) using the sensor array

| Samples | A <sub>370</sub> | A <sub>450</sub> | A <sub>650</sub> | Identification | Verification |
|---------|------------------|------------------|------------------|----------------|--------------|
| 1       | 0.380            | 0.122            | 0.344            | HSA            | HSA          |
| 2       | 0.476            | 0.243            | 0.523            | HSA3           | HSA3         |
| 3       | 0.430            | 0.149            | 0.427            | HSA2           | HSA2         |
| 4       | 0.418            | 0.162            | 0.387            | HSA1           | HSA1         |
| 5       | 0.440            | 0.182            | 0.459            | HSA2           | HSA2         |
| 6       | 0.407            | 0.176            | 0.378            | HSA1           | HSA1         |
| 7       | 0.475            | 0.223            | 0.505            | HSA3           | HSA3         |
| 8       | 0.398            | 0.115            | 0.333            | HSA            | HSA          |

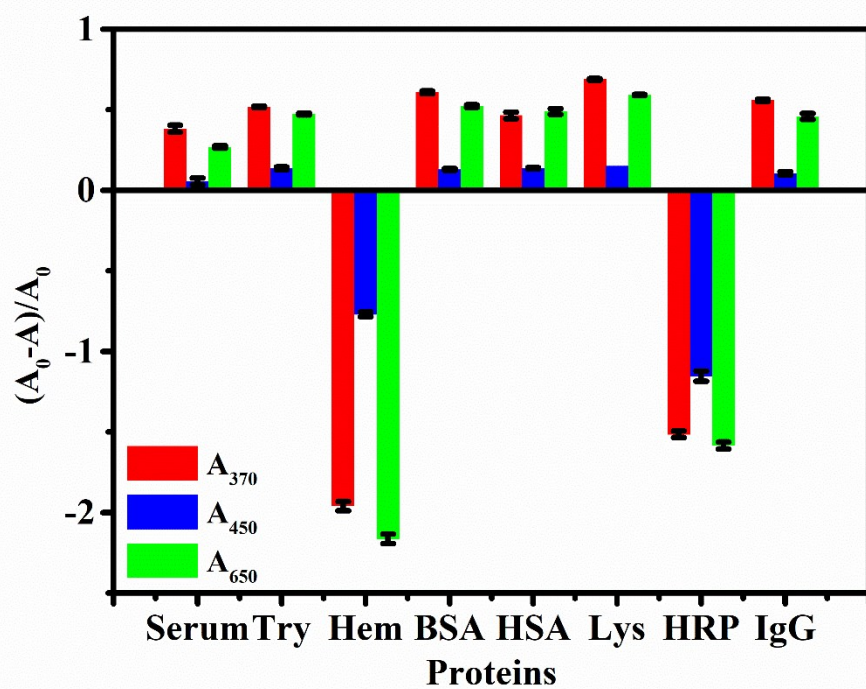

**Fig. S11** Fingerprints of protein samples in serum based on the colorimetric sensor array

**Table S6** Identification of unknown protein samples in serum using the sensor array

| Samples | A <sub>370</sub> | A <sub>450</sub> | A <sub>650</sub> | Identification | Verification |
|---------|------------------|------------------|------------------|----------------|--------------|
| 1       | 0.368            | 0.036            | 0.256            | Serum          | Serum        |
| 2       | 0.353            | 0.027            | 0.266            | Serum          | Serum        |
| 3       | 0.520            | 0.116            | 0.485            | Try            | Try          |
| 4       | -1.450           | -1.179           | -1.532           | HRP            | HRP          |
| 5       | 0.554            | 0.107            | 0.431            | IgG            | IgG          |
| 6       | 0.441            | 0.143            | 0.522            | HSA            | HSA          |
| 7       | -1.923           | -0.759           | -2.121           | Hem            | Hem          |
| 8       | 0.595            | 0.116            | 0.552            | BSA            | BSA          |
| 9       | 0.454            | 0.134            | 0.517            | HSA            | HSA          |
| 10      | -1.911           | -0.795           | -2.114           | Hem            | Hem          |
| 11      | 0.679            | 0.143            | 0.586            | Lys            | Lys          |
| 12      | 0.690            | 0.143            | 0.584            | Lys            | Lys          |
| 13      | 0.521            | 0.116            | 0.470            | Try            | Try          |
| 14      | -1.478           | -1.196           | -1.557           | HRP            | HRP          |
| 15      | 0.614            | 0.116            | 0.532            | BSA            | BSA          |
| 16      | 0.563            | 0.098            | 0.433            | IgG            | IgG          |

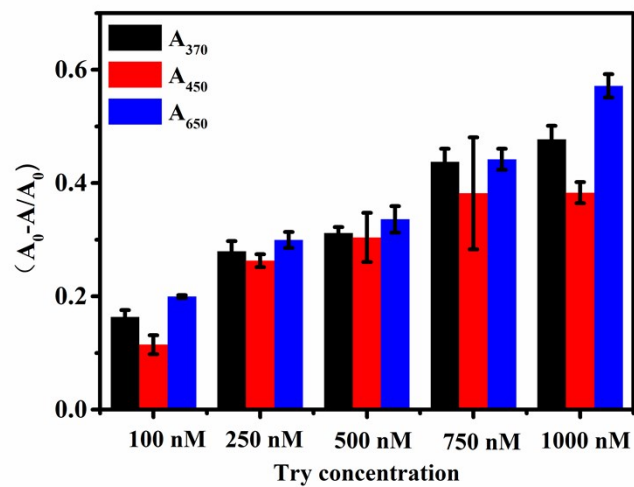

**Fig. S12** Fingerprints of Try at various concentrations based on the colorimetric sensor array (Here,  $A_0$  was the absorbance value of the serum sample, and  $A$  was the absorbance value when the target was present)

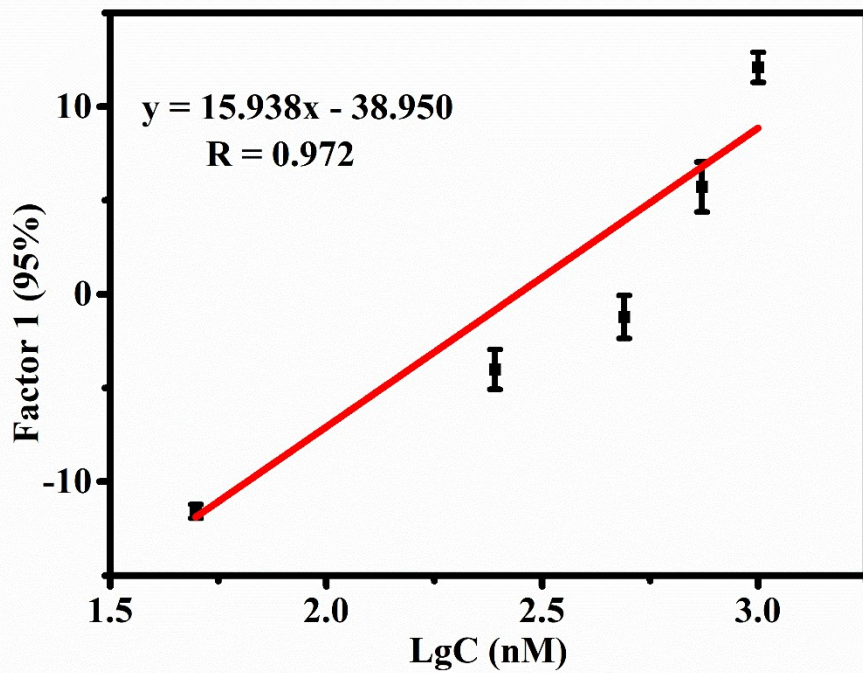

**Fig. S13** Plot of the discriminant Factor (1) versus the logarithm of the Try concentration.

**Table S7** Identification of unknown protein samples (Try at different concentration) using the colorimetric sensor array

| Samples | A <sub>370</sub> | A <sub>450</sub> | A <sub>650</sub> | Identification | Verification |
|---------|------------------|------------------|------------------|----------------|--------------|
| 1       | 0.153            | 0.143            | 0.193            | 100 nM         | 100 nM       |
| 2       | 0.397            | 0.423            | 0.416            | 750 nM         | 750 nM       |
| 3       | 0.470            | 0.439            | 0.541            | 1000 nM        | 1000 nM      |
| 4       | 0.258            | 0.295            | 0.284            | 250 nM         | 250 nM       |
| 5       | 0.324            | 0.359            | 0.327            | 500 nM         | 500 nM       |
| 6       | 0.323            | 0.327            | 0.308            | 500 nM         | 500 nM       |
| 7       | 0.411            | 0.431            | 0.431            | 750 nM         | 750 nM       |
| 8       | 0.139            | 0.079            | 0.180            | 100 nM         | 100 nM       |
| 9       | 0.252            | 0.279            | 0.280            | 250 nM         | 250 nM       |
| 10      | 0.478            | 0.399            | 0.509            | 1000 nM        | 1000 nM      |

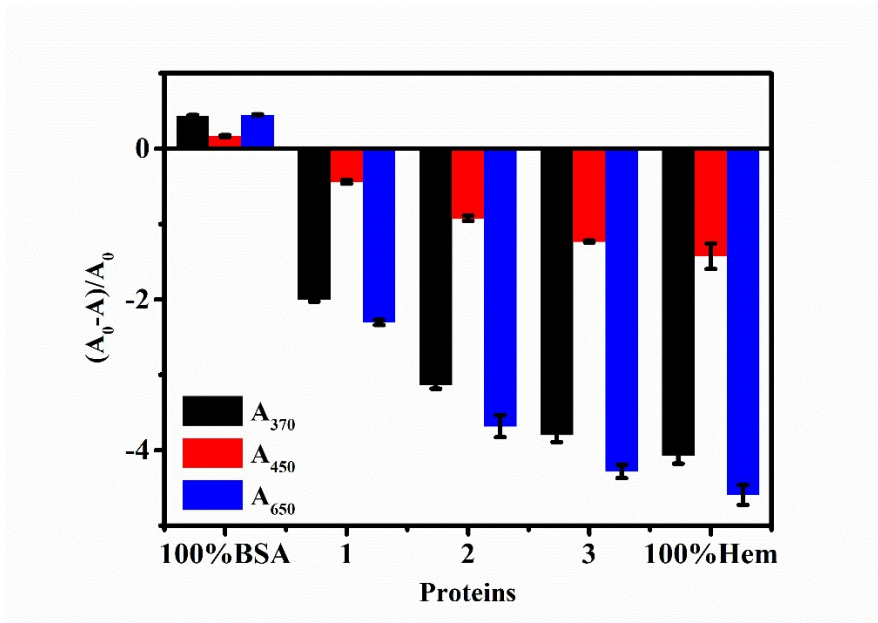

**Fig. S14** Absorbance response for discrimination mixtures of BSA and Hem at different molar ratios (total protein concentration: 400 nM) (Here,  $A_0$  was the absorbance value of the serum sample, and  $A$  was the absorbance value when the target was present).



**Table S8** Identification of unknown protein samples at different molar ratios using the sensor array

| Samples | A <sub>370</sub> | A <sub>450</sub> | A <sub>650</sub> | Identification  | Verification    |
|---------|------------------|------------------|------------------|-----------------|-----------------|
| 1       | 0.403            | 0.175            | 0.427            | 100% BSA        | 100% BSA        |
| 2       | -3.864           | -1.230           | -4.376           | 25% BSA+75% Hem | 25% BSA+75% Hem |
| 3       | -4.099           | -1.548           | -4.627           | 100% Hem        | 100% Hem        |
| 4       | -3.147           | -0.889           | -3.590           | 50% BSA+50% Hem | 50% BSA+50% Hem |
| 5       | -1.917           | -0.437           | -2.393           | 75% BSA+25% Hem | 75% BSA+25% Hem |
| 6       | -1.917           | -0.413           | -2.322           | 75% BSA+25% Hem | 75% BSA+25% Hem |
| 7       | -3.762           | -1.238           | -4.260           | 25% BSA+75% Hem | 25% BSA+75% Hem |
| 8       | -4.030           | -1.357           | -4.545           | 100% Hem        | 100% Hem        |
| 9       | 0.405            | 0.183            | 0.395            | 100% BSA        | 100% BSA        |
| 10      | -3.235           | -0.944           | -3.692           | 50% BSA+50% Hem | 50% BSA+50% Hem |

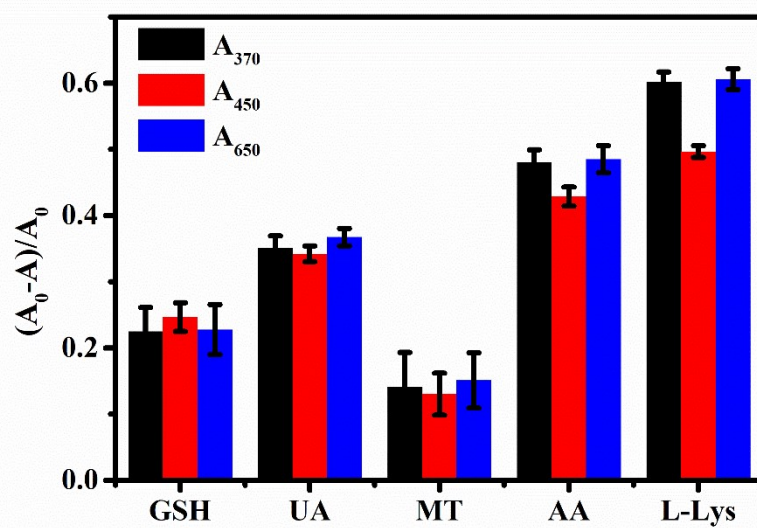

**Fig. S15** Absorbance response for antioxidant samples.

**Table S9** Identification of unknown antioxidant samples using the sensor array

| Samples | A <sub>370</sub> | A <sub>450</sub> | A <sub>650</sub> | Identification | Verification |
|---------|------------------|------------------|------------------|----------------|--------------|
| 1       | 0.290            | 0.229            | 0.295            | GSH            | GSH          |
| 2       | 0.564            | 0.486            | 0.572            | L-Lys          | L-Lys        |
| 3       | 0.489            | 0.438            | 0.492            | AA             | AA           |
| 4       | 0.328            | 0.326            | 0.334            | UA             | UA           |
| 5       | 0.331            | 0.326            | 0.336            | UA             | UA           |
| 6       | 0.095            | 0.090            | 0.244            | MT             | MT           |
| 7       | 0.495            | 0.431            | 0.498            | AA             | AA           |
| 8       | 0.278            | 0.222            | 0.283            | GSH            | GSH          |
| 9       | 0.112            | 0.083            | 0.231            | MT             | MT           |
| 10      | 0.572            | 0.493            | 0.576            | L-Lys          | L-Lys        |

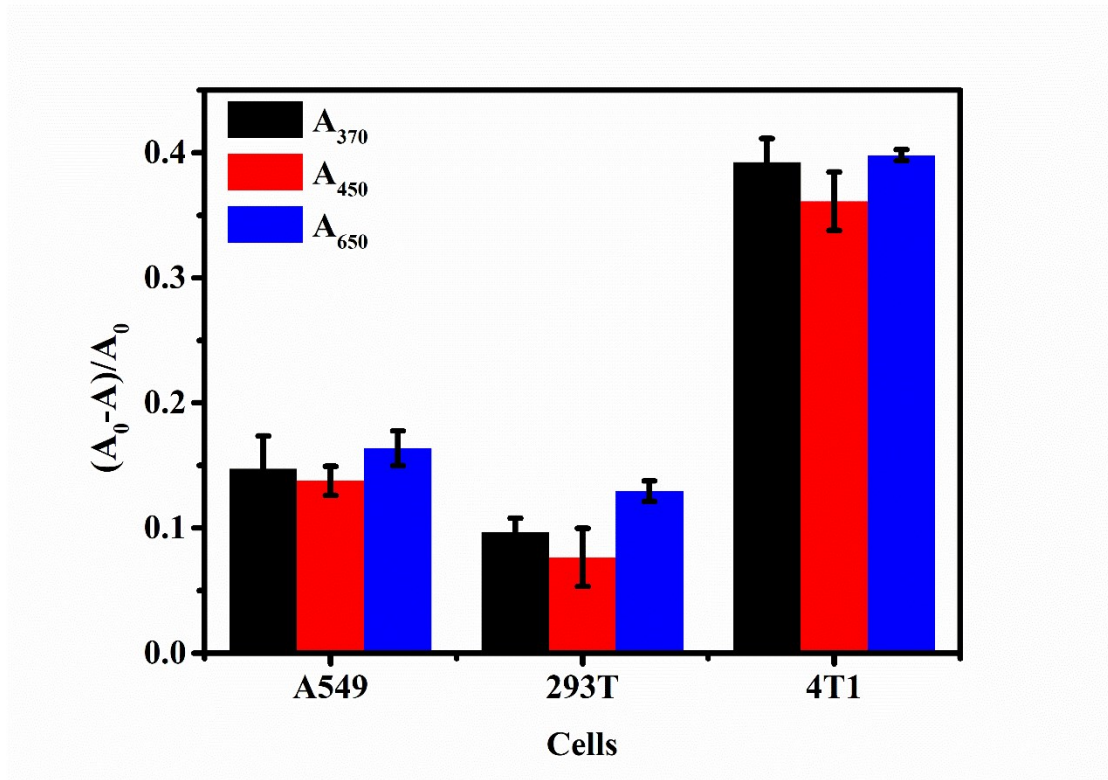

Fig. S16 Absorbance response for cell.

**Table S10** Identification of unknown cell samples using the sensor array

| Samples | $A_{370}$ | $A_{450}$ | $A_{650}$ | Identification | Verification |
|---------|-----------|-----------|-----------|----------------|--------------|
| 1       | 0.174     | 0.147     | 0.167     | A549           | A549         |
| 2       | 0.417     | 0.392     | 0.414     | 4T1            | 4T1          |
| 3       | 0.100     | 0.086     | 0.077     | 293T           | 293T         |
| 4       | 0.398     | 0.380     | 0.415     | 4T1            | 4T1          |
| 5       | 0.153     | 0.184     | 0.182     | A549           | A549         |

## References

1. S. Lee, J. Kim, H. Yang, E. Cortes, S. Kang and S. W. Han, *Angew. Chem. Int. Ed.*, **2019**, 58, 15890-15894.
2. X. Wang, L. Qin, M. Zhou, Z. Lou and H. Wei, *Anal. Chem.*, **2018**, 90, 11696-11702.
3. C. Niu, M. Peng, Y. You, R. Wang, Y. Jia, T. Xie, J. Wang, N. Na and J. Ouyang, *Chem. Commun.*, **2017**, 53, 5633-5636.
4. W. Zhang, S. Hu, J. J. Yin, W. He, W. Lu, M. Ma, N. Gu and Y. Zhang, *J. Am. Chem. Soc.*, **2016**, 138, 5860-5865.
5. W. Xu, L. Jiao, H. Yan, Y. Wu, L. Chen, W. Gu, D. Du, Y. Lin and C. Zhu, *ACS Appl. Mater. Interfaces*, **2019**, 11, 22096-22101.
6. L. Gao, J. Zhuang, L. Nie, J. Zhang, Y. Zhang, N. Gu, T. Wang, J. Feng, D. Yang, S. Perrett and X. Yan, *Nat. Nanotechnol.*, **2007**, 2, 577-583.
